# Supplementary material
Source: PubMed Central journal article supplement (PMC3889511)
Supplement: CVI.00519-13_zcd999094883so1.pdf [file CVI.00519-13_zcd999094883so1.pdf]

**a**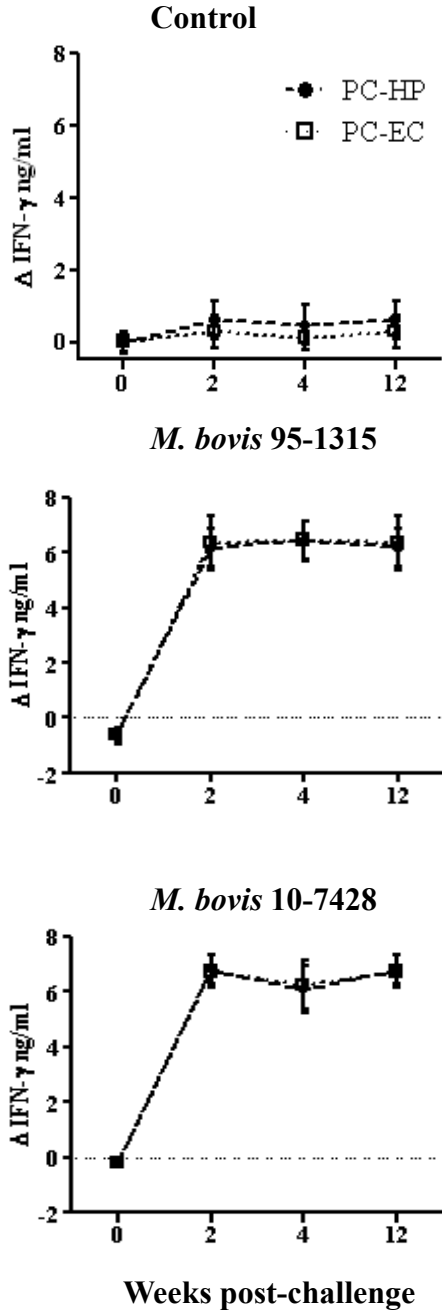**b**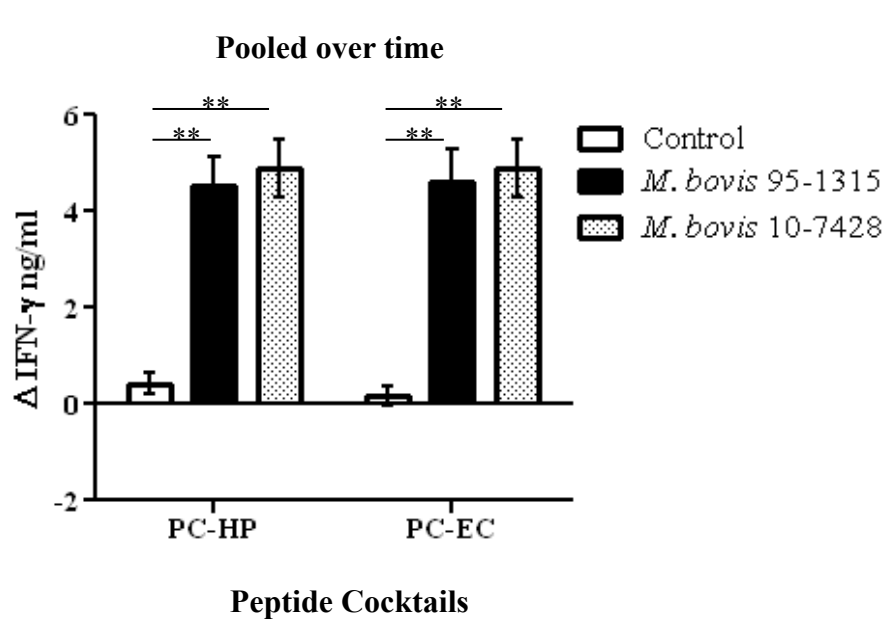

Supplemental Figure 1: Comparison of IFN- $\gamma$  responses to PC-HP and PC-EC in control (n=7) as well as, *M. bovis* 95-1315 (n=8), and *M. bovis* 10-7428 infected (n=8) animals. a) Responses over time and b) Pooled over time.

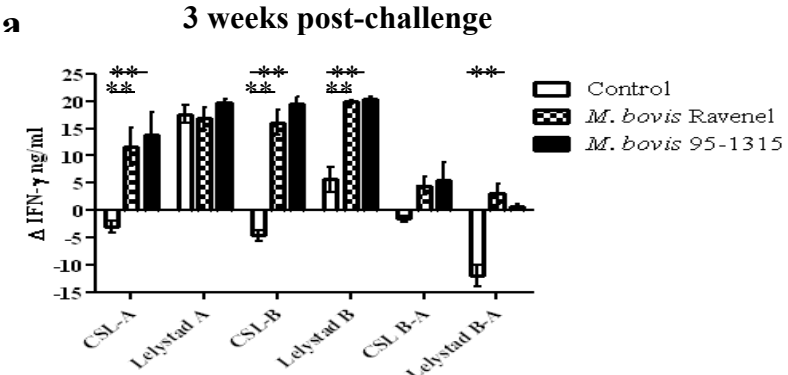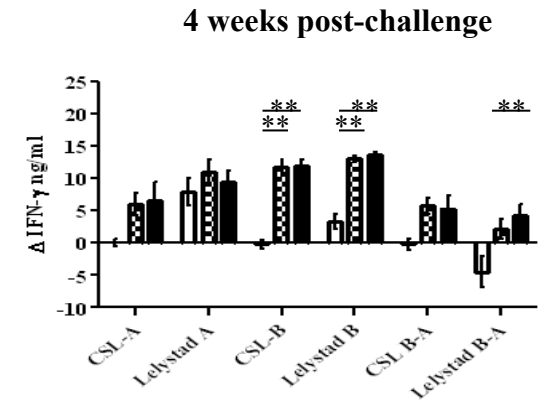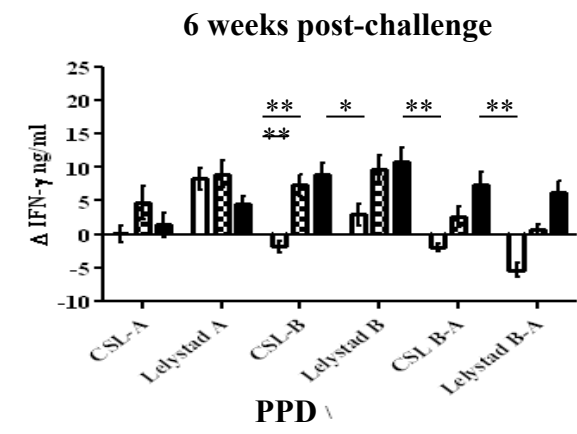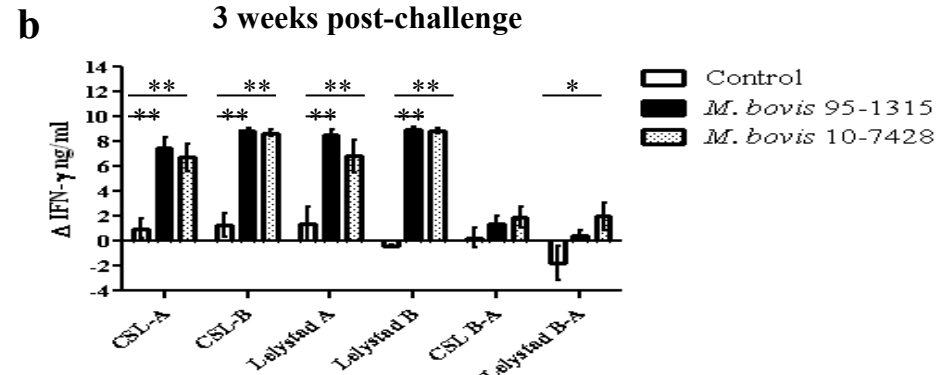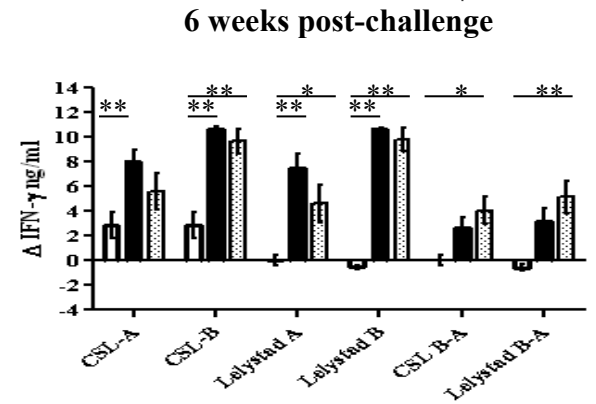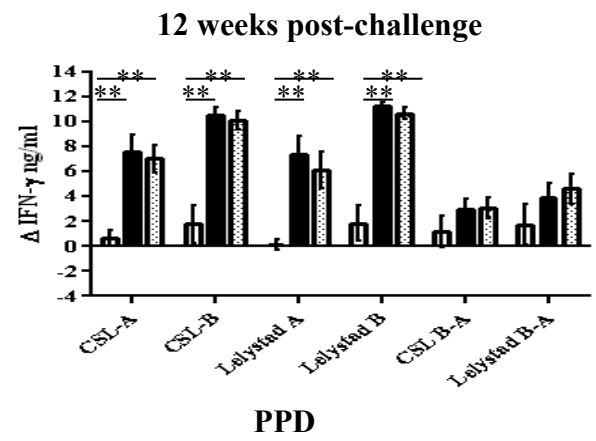

Supplemental 2: IFN- $\gamma$  responses to Commonwealth Serum Laboratories (CSL) and Lelystad (LEL) PPDs. a) Responses at 3, 4, and 6 weeks post-challenge in control (n=5) as well as, *M. bovis* Ravenel (n=5), and *M. bovis* 95-1315 infected (n=5) animals. b) Responses at 3, 6 and 12 weeks post-challenge in control (n=7) as well as, *M. bovis* 95-1315 (n=8), and *M. bovis* 10-7428 infected (n=8) animals. PPDa refers to *M. avium* derived PPD, PPDb refers to *M. bovis* derived PPD, and B-A indicates values for PPDb-PPDa.
